# Supplementary material
Source: publisher figshare collection journal article supplement (https://acs.figshare.com/ndownloader/files/5195446)
Supplement: Supplementary file 1 [file 5195446]

# SUBMISSION DETAILS

_publ_requested_journal             'Journal of the American Chemical Society'
_publ_contact_author
;
        Tamaki Nakano
        Graduate School of Materials Science, Nara Institute 
        of Science and Technology (NAIST), Takayama-cho 
        8916-5, Ikoma, Nara 630-0101, Japan
;
_publ_contact_author_phone            '81 743 72 6081'
_publ_contact_author_fax              '81 743 72 6081'
_publ_contact_author_email            'nakano@ms.aist-nara.ac.jp.'
_publ_contact_letter
;
    ?
;
_publ_requested_coeditor_name          ?

#==============================================================================

# TITLE AND AUTHOR LIST


_publ_section_title
;
    Synthesis, Structure, and Photophysical and Electrochemical Properties of a \p-Stacked Polymer 
;

loop_
_publ_author_name
_publ_author_address
     'Tamaki Nakano'
;    Graduate School of Materials Science, Nara Institute 
     of Science and Technology (NAIST), Takayama-cho 
     8916-5, Ikoma, Nara 630-0101, Japan
;
     'Tohru Yade'
;    Graduate School of Materials Science, Nara Institute 
     of Science and Technology (NAIST), Takayama-cho 
     8916-5, Ikoma, Nara 630-0101, Japan
;


#==============================================================================
# TEXT

_publ_section_abstract
;

;

_publ_section_exptl_refinement
;
 The crystal was obtained from a concentrated solution of 5(n=5) in chloroform. 
;

_publ_section_references
;

;

_publ_section_acknowledgements
;

;

_publ_section_figure_captions
;

;

#==============================================================================
data__5(n=5)

_computing_data_collection            'PROCESS-AUTO'
_computing_cell_refinement            'PROCESS-AUTO'
_computing_data_reduction             'teXsan Ver. 1.10'
_computing_structure_solution          
;
SHELX97 (Sheldrick, 1997)
;
_computing_structure_refinement       'teXsan Ver. 1.10'
_computing_publication_material       'teXsan Ver. 1.10'
#------------------------------------------------------------------------------
_cell_length_a                         11.5072(5)
_cell_length_b                         22.102(1)
_cell_length_c                         27.047(2)
_cell_angle_alpha                      90
_cell_angle_beta                       89.836(1)
_cell_angle_gamma                      90
_cell_volume                           6879.1(5)
_cell_formula_units_Z                  4
_cell_measurement_temperature          296.2
_cell_measurement_reflns_used          39120
_cell_measurement_theta_min            1.2
_cell_measurement_theta_max            27.4
#------------------------------------------------------------------------------
_symmetry_cell_setting                 monoclinic
_symmetry_space_group_name_H-M        'P 21/c     '
_symmetry_Int_Tables_number            14
_symmetry_space_group_name_Hall        ?
loop_
_symmetry_equiv_pos_as_xyz
  '   +x,   +y,   +z'
  '   -x,1/2+y,1/2-z'
  '   -x,   -y,   -z'
  '   +x,1/2-y,1/2+z'
#------------------------------------------------------------------------------

_publ_section_exptl_prep
;

;
_exptl_crystal_description            'block'
_exptl_crystal_colour                 'colorless'
_exptl_crystal_size_max                0.40
_exptl_crystal_size_mid                0.13
_exptl_crystal_size_min                0.10
_exptl_crystal_density_diffrn          1.023
_exptl_crystal_density_method     'not measured'
_chemical_formula_weight               1059.40
_chemical_formula_analytical           ?
_chemical_formula_sum                  'C83 H62 '
_chemical_formula_moiety               'C83 H62 '
_chemical_formula_structural           ?
_chemical_compound_source              ?
_exptl_crystal_F_000                   2240.00
_exptl_absorpt_coefficient_mu          0.058
_exptl_absorpt_correction_type         ?
_exptl_special_details
;
 ?
;

#==============================================================================

# EXPERIMENTAL DATA

_diffrn_special_details
;
 ?
;
_diffrn_ambient_temperature            296.2
_diffrn_radiation_wavelength           0.7107
_diffrn_radiation_type                 'Mo K\a'
_diffrn_radiation_source              'X-ray tube'
_diffrn_radiation_monochromator        graphite
_diffrn_radiation_detector            'scintillation counter'
_diffrn_measurement_device            'RAXIS-RAPID'
_diffrn_measurement_method            ?

_diffrn_standards_number              0
_diffrn_standards_interval_count      0
_diffrn_standards_decay_%             0.00
_diffrn_reflns_number                  46223
_reflns_number_total                   14864
_reflns_number_gt                      14863
_reflns_threshold_expression           I>-10.00\s(I)
_diffrn_reflns_av_R_equivalents        0.10174
_diffrn_reflns_av_sigmaI/netI          ?
_diffrn_reflns_limit_h_min             0
_diffrn_reflns_limit_h_max             14
_diffrn_reflns_limit_k_min             0
_diffrn_reflns_limit_k_max             28
_diffrn_reflns_limit_l_min             -34
_diffrn_reflns_limit_l_max             34
_diffrn_reflns_theta_min               0.75
_diffrn_reflns_theta_max               27.38
_diffrn_reflns_reduction_process      'Lp corrections applied'
_diffrn_orient_matrix_UB_11            0.02207
_diffrn_orient_matrix_UB_12            0.02293
_diffrn_orient_matrix_UB_13            0.03043
_diffrn_orient_matrix_UB_21           -0.03738
_diffrn_orient_matrix_UB_22            0.03719
_diffrn_orient_matrix_UB_23           -0.01375
_diffrn_orient_matrix_UB_31           -0.07528
_diffrn_orient_matrix_UB_32           -0.01174
_diffrn_orient_matrix_UB_33            0.01587
#------------------------------------------------------------------------------
loop_
_atom_type_symbol
_atom_type_oxidation_number
_atom_type_number_in_cell
_atom_type_scat_dispersion_real
_atom_type_scat_dispersion_imag
_atom_type_scat_source
  C  0   332 0.002 0.002 
;International Tables for Crystallography
(1992, Vol. C, Table 6.1.1.2)
;
  H  0   248 0.000 0.000 
;International Tables for Crystallography
(1992, Vol. C, Table 6.1.1.2)
;

#==============================================================================

# ATOMIC COORDINATES AND THERMAL PARAMETERS

loop_
_atom_site_label
_atom_site_fract_x
_atom_site_fract_y
_atom_site_fract_z
_atom_site_U_iso_or_equiv
_atom_site_occupancy
_atom_site_refinement_flags
_atom_site_adp_type
_atom_site_calc_flag
_atom_site_calc_attached_atom
C(1) 0.7472(7) 0.3116(4) 0.4749(3) 0.085(3) 1.000   .  Uani d ?
C(2) 0.7373(8) 0.3653(5) 0.5024(4) 0.114(4) 1.000   .  Uani d ?
C(3) 0.837(1) 0.3781(7) 0.5346(4) 0.156(6) 1.000   .  Uani d ?
C(4) 0.929(1) 0.3395(8) 0.5356(6) 0.151(6) 1.000   .  Uani d ?
C(5) 0.937(1) 0.2913(6) 0.5090(6) 0.154(6) 1.000   .  Uani d ?
C(6) 0.8445(8) 0.2761(4) 0.4784(4) 0.111(4) 1.000   .  Uani d ?
C(7) 0.6475(6) 0.2965(3) 0.4396(3) 0.078(3) 1.000   .  Uani d ?
C(8) 0.5503(5) 0.2543(3) 0.4615(2) 0.060(2) 1.000   .  Uani d ?
C(9) 0.6043(6) 0.1972(4) 0.4818(3) 0.069(3) 1.000   .  Uani d ?
C(10) 0.6674(7) 0.1539(5) 0.4571(4) 0.100(4) 1.000   .  Uani d ?
C(11) 0.7123(9) 0.1027(6) 0.4891(7) 0.169(6) 1.000   .  Uani d ?
C(12) 0.690(2) 0.114(1) 0.544(1) 0.26(1) 1.000   .  Uani d ?
C(13) 0.634(2) 0.147(1) 0.5586(9) 0.22(1) 1.000   .  Uani d ?
C(14) 0.5899(9) 0.1943(7) 0.5322(4) 0.119(5) 1.000   .  Uani d ?
C(15) 0.5250(8) 0.2482(8) 0.5478(4) 0.122(5) 1.000   .  Uani d ?
C(16) 0.491(1) 0.263(1) 0.5932(6) 0.23(1) 1.000   .  Uani d ?
C(17) 0.433(2) 0.310(2) 0.5985(8) 0.26(1) 1.000   .  Uani d ?
C(18) 0.398(1) 0.3516(9) 0.5588(9) 0.22(1) 1.000   .  Uani d ?
C(19) 0.4400(9) 0.3342(6) 0.5122(4) 0.139(5) 1.000   .  Uani d ?
C(20) 0.5002(7) 0.2814(5) 0.5072(4) 0.091(3) 1.000   .  Uani d ?
C(21) 0.4604(5) 0.2480(3) 0.4187(2) 0.060(2) 1.000   .  Uani d ?
C(22) 0.3664(5) 0.1964(3) 0.4189(2) 0.048(2) 1.000   .  Uani d ?
C(23) 0.4198(5) 0.1365(3) 0.4048(3) 0.055(2) 1.000   .  Uani d ?
C(24) 0.4825(5) 0.1209(3) 0.3627(2) 0.059(2) 1.000   .  Uani d ?
C(25) 0.5262(6) 0.0629(4) 0.3591(3) 0.075(3) 1.000   .  Uani d ?
C(26) 0.5091(7) 0.0204(4) 0.3952(4) 0.084(3) 1.000   .  Uani d ?
C(27) 0.4479(6) 0.0351(4) 0.4370(3) 0.073(3) 1.000   .  Uani d ?
C(28) 0.4032(5) 0.0930(3) 0.4430(3) 0.057(2) 1.000   .  Uani d ?
C(29) 0.3374(5) 0.1206(4) 0.4829(3) 0.059(2) 1.000   .  Uani d ?
C(30) 0.2983(6) 0.0973(4) 0.5270(3) 0.080(3) 1.000   .  Uani d ?
C(31) 0.2358(8) 0.1340(6) 0.5582(3) 0.103(4) 1.000   .  Uani d ?
C(32) 0.2120(6) 0.1946(6) 0.5468(3) 0.092(3) 1.000   .  Uani d ?
C(33) 0.2519(6) 0.2196(4) 0.5018(3) 0.074(3) 1.000   .  Uani d ?
C(34) 0.3157(5) 0.1815(4) 0.4698(2) 0.057(2) 1.000   .  Uani d ?
C(35) 0.2724(5) 0.2213(3) 0.3815(2) 0.047(2) 1.000   .  Uani d ?
C(36) 0.1814(5) 0.1789(3) 0.3575(2) 0.040(2) 1.000   .  Uani d ?
C(37) 0.2336(5) 0.1415(3) 0.3169(2) 0.044(2) 1.000   .  Uani d ?
C(38) 0.2947(5) 0.1586(3) 0.2756(3) 0.056(2) 1.000   .  Uani d ?
C(39) 0.3358(6) 0.1169(4) 0.2424(3) 0.070(3) 1.000   .  Uani d ?
C(40) 0.3179(7) 0.0578(5) 0.2512(3) 0.093(3) 1.000   .  Uani d ?
C(41) 0.2569(6) 0.0367(4) 0.2936(3) 0.081(3) 1.000   .  Uani d ?
C(42) 0.2162(5) 0.0810(3) 0.3256(2) 0.052(2) 1.000   .  Uani d ?
C(43) 0.1523(5) 0.0742(3) 0.3726(3) 0.057(2) 1.000   .  Uani d ?
C(44) 0.1106(7) 0.0216(3) 0.3979(3) 0.078(3) 1.000   .  Uani d ?
C(45) 0.0478(7) 0.0299(4) 0.4407(3) 0.087(3) 1.000   .  Uani d ?
C(46) 0.0273(6) 0.0861(5) 0.4593(3) 0.077(3) 1.000   .  Uani d ?
C(47) 0.0662(5) 0.1379(3) 0.4348(3) 0.060(2) 1.000   .  Uani d ?
C(48) 0.1308(5) 0.1313(3) 0.3912(2) 0.046(2) 1.000   .  Uani d ?
C(49) 0.0845(5) 0.2232(3) 0.3395(2) 0.045(2) 1.000   .  Uani d ?
C(50) -0.0096(5) 0.2045(3) 0.3007(2) 0.046(2) 1.000   .  Uani d ?
C(51) 0.0421(5) 0.2025(3) 0.2479(2) 0.055(2) 1.000   .  Uani d ?
C(52) 0.1033(5) 0.2477(3) 0.2227(2) 0.060(2) 1.000   .  Uani d ?
C(53) 0.1417(6) 0.2346(5) 0.1760(3) 0.084(3) 1.000   .  Uani d ?
C(54) 0.1233(7) 0.1801(6) 0.1546(3) 0.094(4) 1.000   .  Uani d ?
C(55) 0.0660(7) 0.1355(4) 0.1792(3) 0.091(3) 1.000   .  Uani d ?
C(56) 0.0227(5) 0.1458(4) 0.2269(3) 0.063(2) 1.000   .  Uani d ?
C(57) -0.0394(5) 0.1095(3) 0.2628(3) 0.061(2) 1.000   .  Uani d ?
C(58) -0.0814(7) 0.0515(4) 0.2586(4) 0.096(4) 1.000   .  Uani d ?
C(59) -0.1421(8) 0.0262(4) 0.2982(6) 0.113(5) 1.000   .  Uani d ?
C(60) -0.1602(7) 0.0577(5) 0.3399(4) 0.099(4) 1.000   .  Uani d ?
C(61) -0.1198(6) 0.1177(3) 0.3443(3) 0.068(3) 1.000   .  Uani d ?
C(62) -0.0571(5) 0.1421(3) 0.3054(3) 0.049(2) 1.000   .  Uani d ?
C(63) -0.1075(5) 0.2545(3) 0.3067(2) 0.054(2) 1.000   .  Uani d ?
C(64) -0.1982(5) 0.2671(3) 0.2655(2) 0.053(2) 1.000   .  Uani d ?
C(65) -0.1473(5) 0.3049(3) 0.2236(3) 0.055(2) 1.000   .  Uani d ?
C(66) -0.0898(6) 0.3578(3) 0.2252(3) 0.069(3) 1.000   .  Uani d ?
C(67) -0.0524(6) 0.3841(4) 0.1809(4) 0.086(3) 1.000   .  Uani d ?
C(68) -0.0715(7) 0.3562(4) 0.1371(4) 0.088(3) 1.000   .  Uani d ?
C(69) -0.1309(6) 0.3012(4) 0.1350(3) 0.079(3) 1.000   .  Uani d ?
C(70) -0.1694(5) 0.2761(3) 0.1788(3) 0.057(2) 1.000   .  Uani d ?
C(71) -0.2313(5) 0.2199(3) 0.1877(3) 0.060(2) 1.000   .  Uani d ?
C(72) -0.2746(7) 0.1767(4) 0.1554(3) 0.082(3) 1.000   .  Uani d ?
C(73) -0.3331(8) 0.1281(5) 0.1732(4) 0.100(4) 1.000   .  Uani d ?
C(74) -0.3472(6) 0.1213(4) 0.2229(4) 0.094(3) 1.000   .  Uani d ?
C(75) -0.3064(5) 0.1639(4) 0.2566(3) 0.069(3) 1.000   .  Uani d ?
C(76) -0.2469(5) 0.2129(3) 0.2386(3) 0.055(2) 1.000   .  Uani d ?
C(77) -0.2969(5) 0.3014(3) 0.2921(2) 0.066(2) 1.000   .  Uani d ?
C(78) -0.3928(5) 0.3254(3) 0.2583(3) 0.061(2) 1.000   .  Uani d ?
C(79) -0.3865(6) 0.3830(3) 0.2385(3) 0.089(3) 1.000   .  Uani d ?
C(80) -0.4766(8) 0.4059(4) 0.2090(4) 0.113(4) 1.000   .  Uani d ?
C(81) -0.5700(7) 0.3693(5) 0.1983(4) 0.119(4) 1.000   .  Uani d ?
C(82) -0.5775(7) 0.3110(4) 0.2170(4) 0.119(4) 1.000   .  Uani d ?
C(83) -0.4894(6) 0.2899(3) 0.2472(3) 0.087(3) 1.000   .  Uani d ?
H(1) 0.6664 0.3919 0.5014 0.145 1.000   .  Uiso c ?
H(2) 0.8364 0.4168 0.5534 0.180 1.000   .  Uiso c ?
H(3) 0.9930 0.3489 0.5574 0.180 1.000   .  Uiso c ?
H(4) 1.0072 0.2649 0.5111 0.200 1.000   .  Uiso c ?
H(5) 0.8483 0.2391 0.4590 0.138 1.000   .  Uiso c ?
H(6) 0.6125 0.3338 0.4279 0.103 1.000   .  Uiso c ?
H(7) 0.6810 0.2772 0.4105 0.103 1.000   .  Uiso c ?
H(8) 0.6790 0.1574 0.4204 0.124 1.000   .  Uiso c ?
H(9) 0.7581 0.0691 0.4709 0.201 1.000   .  Uiso c ?
H(10) 0.7267 0.0753 0.5561 0.243 1.000   .  Uiso c ?
H(11) 0.6283 0.1434 0.5965 0.205 1.000   .  Uiso c ?
H(12) 0.4986 0.2300 0.6241 0.241 1.000   .  Uiso c ?
H(13) 0.4119 0.3243 0.6285 0.235 1.000   .  Uiso c ?
H(14) 0.3553 0.3924 0.5648 0.249 1.000   .  Uiso c ?
H(15) 0.4251 0.3595 0.4806 0.173 1.000   .  Uiso c ?
H(16) 0.4207 0.2858 0.4166 0.072 1.000   .  Uiso c ?
H(17) 0.5059 0.2431 0.3889 0.072 1.000   .  Uiso c ?
H(18) 0.4954 0.1504 0.3365 0.073 1.000   .  Uiso c ?
H(19) 0.5727 0.0529 0.3301 0.093 1.000   .  Uiso c ?
H(20) 0.5407 -0.0206 0.3905 0.104 1.000   .  Uiso c ?
H(21) 0.4362 0.0047 0.4623 0.094 1.000   .  Uiso c ?
H(22) 0.3152 0.0549 0.5361 0.103 1.000   .  Uiso c ?
H(23) 0.2062 0.1171 0.5890 0.127 1.000   .  Uiso c ?
H(24) 0.1684 0.2210 0.5698 0.112 1.000   .  Uiso c ?
H(25) 0.2357 0.2617 0.4918 0.093 1.000   .  Uiso c ?
H(26) 0.2299 0.2525 0.3995 0.062 1.000   .  Uiso c ?
H(27) 0.3139 0.2414 0.3555 0.062 1.000   .  Uiso c ?
H(28) 0.3098 0.2020 0.2708 0.074 1.000   .  Uiso c ?
H(29) 0.3780 0.1289 0.2127 0.085 1.000   .  Uiso c ?
H(30) 0.3496 0.0290 0.2281 0.109 1.000   .  Uiso c ?
H(31) 0.2427 -0.0061 0.2992 0.103 1.000   .  Uiso c ?
H(32) 0.1267 -0.0186 0.3845 0.092 1.000   .  Uiso c ?
H(33) 0.0158 -0.0048 0.4581 0.105 1.000   .  Uiso c ?
H(34) -0.0152 0.0914 0.4911 0.092 1.000   .  Uiso c ?
H(35) 0.0511 0.1779 0.4475 0.077 1.000   .  Uiso c ?
H(36) 0.0446 0.2376 0.3687 0.058 1.000   .  Uiso c ?
H(37) 0.1250 0.2582 0.3257 0.058 1.000   .  Uiso c ?
H(38) 0.1176 0.2877 0.2385 0.078 1.000   .  Uiso c ?
H(39) 0.1816 0.2656 0.1565 0.100 1.000   .  Uiso c ?
H(40) 0.1526 0.1709 0.1211 0.107 1.000   .  Uiso c ?
H(41) 0.0535 0.0957 0.1641 0.109 1.000   .  Uiso c ?
H(42) -0.0725 0.0284 0.2269 0.118 1.000   .  Uiso c ?
H(43) -0.1693 -0.0155 0.2964 0.137 1.000   .  Uiso c ?
H(44) -0.2029 0.0406 0.3680 0.122 1.000   .  Uiso c ?
H(45) -0.1362 0.1417 0.3746 0.086 1.000   .  Uiso c ?
H(46) -0.1509 0.2440 0.3359 0.071 1.000   .  Uiso c ?
H(47) -0.0679 0.2916 0.3128 0.071 1.000   .  Uiso c ?
H(48) -0.0765 0.3773 0.2578 0.088 1.000   .  Uiso c ?
H(49) -0.0134 0.4241 0.1817 0.108 1.000   .  Uiso c ?
H(50) -0.0429 0.3744 0.1062 0.113 1.000   .  Uiso c ?
H(51) -0.1442 0.2802 0.1034 0.097 1.000   .  Uiso c ?
H(52) -0.2652 0.1831 0.1196 0.106 1.000   .  Uiso c ?
H(53) -0.3642 0.0974 0.1505 0.126 1.000   .  Uiso c ?
H(54) -0.3888 0.0850 0.2359 0.117 1.000   .  Uiso c ?
H(55) -0.3180 0.1593 0.2921 0.087 1.000   .  Uiso c ?
H(56) -0.3319 0.2750 0.3166 0.085 1.000   .  Uiso c ?
H(57) -0.2642 0.3352 0.3104 0.085 1.000   .  Uiso c ?
H(58) -0.3159 0.4078 0.2441 0.108 1.000   .  Uiso c ?
H(59) -0.4712 0.4481 0.1955 0.127 1.000   .  Uiso c ?
H(60) -0.6351 0.3875 0.1802 0.143 1.000   .  Uiso c ?
H(61) -0.6414 0.2852 0.2067 0.144 1.000   .  Uiso c ?
H(62) -0.4950 0.2493 0.2624 0.107 1.000   .  Uiso c ?

loop_
_atom_site_aniso_label
_atom_site_aniso_U_11
_atom_site_aniso_U_22
_atom_site_aniso_U_33
_atom_site_aniso_U_12
_atom_site_aniso_U_13
_atom_site_aniso_U_23
 C(1)   0.075(6)    0.126(8)    0.053(5)    -0.037(5)   -0.004(4)   0.000(5)   
 C(2)   0.099(7)    0.126(8)    0.117(9)    -0.035(6)   -0.008(6)   -0.015(7)  
 C(3)   0.15(1)     0.20(1)     0.11(1)     -0.08(1)    -0.014(9)   -0.07(1)   
 C(4)   0.10(1)     0.21(2)     0.15(1)     -0.02(1)    -0.058(9)   0.00(1)    
 C(5)   0.11(1)     0.16(1)     0.20(2)     -0.010(9)   -0.036(9)   -0.01(1)   
 C(6)   0.048(5)    0.133(8)    0.152(9)    -0.007(5)   -0.036(5)   -0.000(7)  
 C(7)   0.066(5)    0.098(6)    0.071(6)    -0.030(4)   -0.018(4)   -0.005(5)  
 C(8)   0.038(4)    0.096(6)    0.047(4)    -0.013(4)   -0.010(3)   -0.005(4)  
 C(9)   0.038(4)    0.100(6)    0.068(6)    -0.019(4)   -0.023(4)   0.014(5)   
 C(10)  0.058(6)    0.116(8)    0.128(9)    -0.010(5)   -0.044(5)   -0.005(7)  
 C(11)  0.059(7)    0.099(8)    0.35(2)     0.004(5)    -0.11(1)    -0.03(1)   
 C(12)  0.16(2)     0.23(2)     0.38(4)     -0.12(2)    -0.20(3)    0.16(3)    
 C(13)  0.11(1)     0.38(4)     0.18(2)     -0.10(2)    -0.11(1)    0.19(2)    
 C(14)  0.074(7)    0.22(1)     0.068(7)    -0.077(7)   -0.038(6)   0.042(9)   
 C(15)  0.058(6)    0.26(2)     0.043(6)    -0.049(8)   -0.008(5)   -0.031(9)  
 C(16)  0.12(1)     0.49(4)     0.09(1)     -0.13(2)    0.036(9)    -0.13(2)   
 C(17)  0.09(2)     0.52(5)     0.15(2)     -0.10(2)    0.04(1)     -0.24(2)   
 C(18)  0.077(9)    0.28(2)     0.31(3)     -0.00(1)    -0.01(1)    -0.21(2)   
 C(19)  0.074(7)    0.19(1)     0.15(1)     -0.019(7)   0.005(7)    -0.10(1)   
 C(20)  0.051(5)    0.146(9)    0.076(7)    -0.023(5)   -0.009(5)   -0.045(7)  
 C(21)  0.041(4)    0.084(5)    0.054(4)    -0.010(3)   -0.013(3)   0.001(4)   
 C(22)  0.037(4)    0.068(5)    0.039(4)    -0.002(3)   -0.005(3)   0.001(4)   
 C(23)  0.031(3)    0.078(5)    0.055(5)    -0.001(3)   -0.014(3)   0.009(4)   
 C(24)  0.034(4)    0.096(6)    0.048(5)    -0.000(4)   -0.006(3)   0.003(4)   
 C(25)  0.049(5)    0.109(7)    0.068(6)    0.018(4)    -0.014(4)   -0.020(5)  
 C(26)  0.074(6)    0.097(7)    0.082(7)    0.017(5)    -0.028(5)   -0.004(6)  
 C(27)  0.057(5)    0.074(6)    0.088(7)    0.001(4)    -0.030(4)   0.027(5)   
 C(28)  0.035(4)    0.077(5)    0.060(5)    -0.010(3)   -0.018(3)   0.023(4)   
 C(29)  0.048(4)    0.087(6)    0.043(5)    -0.008(4)   -0.013(3)   0.011(4)   
 C(30)  0.063(5)    0.125(7)    0.050(5)    -0.014(5)   -0.010(4)   0.034(5)   
 C(31)  0.073(6)    0.18(1)     0.053(6)    -0.014(7)   -0.013(5)   0.037(7)   
 C(32)  0.053(5)    0.19(1)     0.038(5)    -0.007(6)   -0.000(4)   -0.023(6)  
 C(33)  0.048(4)    0.112(6)    0.061(5)    -0.001(4)   -0.018(4)   -0.005(5)  
 C(34)  0.035(4)    0.094(6)    0.041(4)    -0.006(3)   -0.012(3)   -0.002(4)  
 C(35)  0.035(3)    0.061(4)    0.046(4)    -0.003(3)   -0.016(3)   0.003(3)   
 C(36)  0.036(3)    0.051(4)    0.034(3)    -0.003(3)   -0.007(3)   0.008(3)   
 C(37)  0.034(3)    0.056(4)    0.041(4)    -0.004(3)   -0.011(3)   0.013(3)   
 C(38)  0.034(4)    0.077(5)    0.056(5)    0.009(3)    -0.011(3)   0.010(4)   
 C(39)  0.060(5)    0.096(6)    0.054(5)    0.017(4)    -0.001(4)   0.003(5)   
 C(40)  0.074(6)    0.149(9)    0.056(6)    0.038(6)    -0.004(5)   -0.032(6)  
 C(41)  0.063(5)    0.084(6)    0.095(7)    0.012(4)    -0.027(5)   -0.015(6)  
 C(42)  0.036(4)    0.072(5)    0.048(4)    0.003(3)    -0.008(3)   -0.002(4)  
 C(43)  0.040(4)    0.062(5)    0.068(5)    -0.002(3)   -0.022(3)   0.013(4)   
 C(44)  0.080(5)    0.061(5)    0.092(7)    -0.013(4)   -0.034(5)   0.028(5)   
 C(45)  0.089(6)    0.105(8)    0.066(6)    -0.027(5)   -0.007(5)   0.039(6)   
 C(46)  0.065(5)    0.114(7)    0.053(5)    -0.020(5)   -0.009(4)   0.027(5)   
 C(47)  0.047(4)    0.087(6)    0.047(4)    -0.004(4)   -0.008(3)   0.010(4)   
 C(48)  0.036(4)    0.062(4)    0.041(4)    -0.002(3)   -0.013(3)   0.003(4)   
 C(49)  0.037(3)    0.057(4)    0.041(4)    0.002(3)    -0.012(3)   0.008(3)   
 C(50)  0.033(3)    0.072(5)    0.034(4)    -0.000(3)   -0.009(3)   0.006(3)   
 C(51)  0.030(3)    0.087(5)    0.046(4)    0.015(3)    -0.013(3)   0.003(4)   
 C(52)  0.039(4)    0.102(6)    0.039(4)    0.004(4)    -0.005(3)   0.019(4)   
 C(53)  0.046(5)    0.160(9)    0.047(5)    0.002(5)    -0.002(4)   0.037(6)   
 C(54)  0.054(5)    0.18(1)     0.053(6)    0.009(6)    -0.005(4)   -0.010(7)  
 C(55)  0.067(6)    0.141(9)    0.065(6)    0.024(5)    -0.020(5)   -0.046(6)  
 C(56)  0.043(4)    0.080(5)    0.065(5)    0.011(4)    -0.022(4)   -0.014(5)  
 C(57)  0.050(4)    0.051(5)    0.083(6)    -0.006(3)   -0.021(4)   0.002(5)   
 C(58)  0.060(5)    0.091(7)    0.136(9)    -0.002(5)   -0.032(5)   -0.022(6)  
 C(59)  0.075(7)    0.078(7)    0.19(1)     -0.019(5)   -0.045(8)   0.023(8)   
 C(60)  0.049(5)    0.119(9)    0.130(9)    -0.024(5)   -0.035(5)   0.060(7)   
 C(61)  0.050(4)    0.069(5)    0.086(6)    -0.003(4)   -0.028(4)   0.018(5)   
 C(62)  0.037(4)    0.055(4)    0.056(5)    -0.003(3)   -0.012(3)   0.018(4)   
 C(63)  0.048(4)    0.075(5)    0.040(4)    0.012(3)    -0.004(3)   0.007(4)   
 C(64)  0.036(4)    0.082(5)    0.041(4)    0.013(3)    -0.009(3)   0.007(4)   
 C(65)  0.040(4)    0.067(5)    0.059(5)    0.005(3)    -0.011(3)   0.018(4)   
 C(66)  0.067(5)    0.063(5)    0.077(6)    0.002(4)    -0.016(4)   0.013(5)   
 C(67)  0.062(5)    0.076(6)    0.120(9)    -0.004(4)   -0.010(5)   0.031(6)   
 C(68)  0.082(6)    0.096(7)    0.085(7)    -0.001(5)   0.005(5)    0.033(6)   
 C(69)  0.071(5)    0.112(7)    0.054(5)    0.012(5)    -0.014(4)   0.017(5)   
 C(70)  0.053(4)    0.077(5)    0.042(4)    0.013(4)    -0.006(3)   0.022(4)   
 C(71)  0.050(4)    0.081(5)    0.048(5)    0.003(4)    -0.019(3)   -0.000(4)  
 C(72)  0.083(6)    0.100(7)    0.062(5)    0.007(5)    -0.028(5)   -0.005(5)  
 C(73)  0.094(7)    0.104(8)    0.104(8)    -0.010(5)   -0.042(6)   -0.003(7)  
 C(74)  0.060(5)    0.073(6)    0.15(1)     -0.011(4)   -0.043(6)   0.017(7)   
 C(75)  0.037(4)    0.093(6)    0.077(6)    -0.004(4)   -0.012(4)   0.022(5)   
 C(76)  0.034(4)    0.073(5)    0.058(5)    0.005(3)    -0.017(3)   0.007(4)   
 C(77)  0.045(4)    0.102(6)    0.050(4)    0.016(4)    -0.012(3)   0.008(4)   
 C(78)  0.048(4)    0.076(5)    0.058(5)    0.010(4)    -0.008(3)   0.018(4)   
 C(79)  0.071(5)    0.068(5)    0.128(8)    -0.006(4)   -0.024(5)   0.023(6)   
 C(80)  0.088(7)    0.085(6)    0.17(1)     0.011(5)    -0.058(6)   0.049(7)   
 C(81)  0.069(6)    0.143(9)    0.145(9)    -0.002(6)   -0.061(6)   0.052(8)   
 C(82)  0.074(6)    0.113(8)    0.17(1)     -0.013(5)   -0.065(6)   0.056(7)   
 C(83)  0.053(5)    0.085(6)    0.122(7)    -0.009(4)   -0.022(5)   0.030(5)   

#==============================================================================

# REFINEMENT DATA

_refine_special_details
;
 ?
;
_refine_ls_structure_factor_coef       Fsqd
_refine_ls_matrix_type                 full
_refine_ls_weighting_scheme            sigma
_refine_ls_weighting_details           'w = 1/[\s^2^(Fo) + 0.00063|Fo|^2^]'
_refine_ls_hydrogen_treatment          noref
_refine_ls_extinction_method           none
_refine_ls_extinction_coef             ?
_refine_ls_abs_structure_details       ?
_refine_ls_abs_structure_Flack         ?
_refine_ls_number_reflns               14863
_refine_ls_number_parameters           748
_refine_ls_number_restraints           0
_refine_ls_number_constraints          0
_refine_ls_R_factor_all                0.3550
_refine_ls_R_factor_gt                 0.143
_refine_ls_wR_factor_all               0.3409
_refine_ls_goodness_of_fit_all         1.741
_refine_ls_goodness_of_fit_ref         1.741
_refine_ls_shift/su_max                1.3689
_refine_ls_shift/su_mean               0.0000
_refine_diff_density_min               -1.06
_refine_diff_density_max               1.44

#==============================================================================

# MOLECULAR GEOMETRY

_geom_special_details
;
 ?
;
loop_
_geom_bond_atom_site_label_1
_geom_bond_atom_site_label_2
_geom_bond_distance
_geom_bond_site_symmetry_1
_geom_bond_site_symmetry_2
_geom_bond_publ_flag
 C(1) C(2) 1.41(1) . . ?
 C(1) C(6) 1.37(1) . . ?
 C(1) C(7) 1.53(1) . . ?
 C(2) C(3) 1.47(1) . . ?
 C(2) H(1) 1.01 . . no
 C(3) C(4) 1.36(2) . . ?
 C(3) H(2) 0.99 . . no
 C(4) C(5) 1.29(2) . . ?
 C(4) H(3) 0.97 . . no
 C(5) C(6) 1.39(1) . . ?
 C(5) H(4) 1.00 . . no
 C(6) H(5) 0.97 . . no
 C(7) C(8) 1.571(9) . . ?
 C(7) H(6) 0.97 . . no
 C(7) H(7) 0.97 . . no
 C(8) C(9) 1.51(1) . . ?
 C(8) C(20) 1.49(1) . . ?
 C(8) C(21) 1.562(8) . . ?
 C(9) C(10) 1.37(1) . . ?
 C(9) C(14) 1.37(1) . . ?
 C(10) C(11) 1.51(2) . . ?
 C(10) H(8) 1.01 . . no
 C(11) C(12) 1.52(3) . . ?
 C(11) H(9) 1.04 . . no
 C(12) C(13) 1.06(5) . . ?
 C(12) H(10) 1.00 . . no
 C(13) C(14) 1.36(2) . . ?
 C(13) H(11) 1.03 . . no
 C(14) C(15) 1.47(1) . . ?
 C(15) C(16) 1.33(2) . . ?
 C(15) C(20) 1.35(1) . . ?
 C(16) C(17) 1.24(4) . . ?
 C(16) H(12) 1.12 . . no
 C(17) C(18) 1.47(4) . . ?
 C(17) H(13) 0.90 . . no
 C(18) C(19) 1.40(2) . . ?
 C(18) H(14) 1.04 . . no
 C(19) C(20) 1.36(1) . . ?
 C(19) H(15) 1.04 . . no
 C(21) C(22) 1.573(8) . . ?
 C(21) H(16) 0.95 . . no
 C(21) H(17) 0.97 . . no
 C(22) C(23) 1.507(9) . . ?
 C(22) C(34) 1.529(8) . . ?
 C(22) C(35) 1.582(8) . . ?
 C(23) C(24) 1.390(9) . . ?
 C(23) C(28) 1.425(9) . . ?
 C(24) C(25) 1.38(1) . . ?
 C(24) H(18) 0.97 . . no
 C(25) C(26) 1.37(1) . . ?
 C(25) H(19) 0.97 . . no
 C(26) C(27) 1.37(1) . . ?
 C(26) H(20) 0.99 . . no
 C(27) C(28) 1.389(9) . . ?
 C(27) H(21) 0.97 . . no
 C(28) C(29) 1.451(9) . . ?
 C(29) C(30) 1.373(9) . . ?
 C(29) C(34) 1.415(9) . . ?
 C(30) C(31) 1.37(1) . . ?
 C(30) H(22) 0.99 . . no
 C(31) C(32) 1.40(1) . . ?
 C(31) H(23) 0.97 . . no
 C(32) C(33) 1.41(1) . . ?
 C(32) H(24) 0.99 . . no
 C(33) C(34) 1.412(9) . . ?
 C(33) H(25) 0.99 . . no
 C(35) C(36) 1.549(7) . . ?
 C(35) H(26) 0.98 . . no
 C(35) H(27) 0.96 . . no
 C(36) C(37) 1.498(8) . . ?
 C(36) C(48) 1.508(8) . . ?
 C(36) C(49) 1.561(7) . . ?
 C(37) C(38) 1.371(8) . . ?
 C(37) C(42) 1.373(8) . . ?
 C(38) C(39) 1.373(9) . . ?
 C(38) H(28) 0.98 . . no
 C(39) C(40) 1.34(1) . . ?
 C(39) H(29) 0.97 . . no
 C(40) C(41) 1.42(1) . . ?
 C(40) H(30) 0.96 . . no
 C(41) C(42) 1.387(9) . . ?
 C(41) H(31) 0.97 . . no
 C(42) C(43) 1.475(9) . . ?
 C(43) C(44) 1.431(9) . . ?
 C(43) C(48) 1.381(8) . . ?
 C(44) C(45) 1.38(1) . . ?
 C(44) H(32) 0.98 . . no
 C(45) C(46) 1.36(1) . . ?
 C(45) H(33) 0.97 . . no
 C(46) C(47) 1.39(1) . . ?
 C(46) H(34) 1.00 . . no
 C(47) C(48) 1.399(8) . . ?
 C(47) H(35) 0.97 . . no
 C(49) C(50) 1.565(8) . . ?
 C(49) H(36) 0.97 . . no
 C(49) H(37) 0.98 . . no
 C(50) C(51) 1.548(8) . . ?
 C(50) C(62) 1.490(8) . . ?
 C(50) C(63) 1.585(8) . . ?
 C(51) C(52) 1.398(9) . . ?
 C(51) C(56) 1.395(9) . . ?
 C(52) C(53) 1.37(1) . . ?
 C(52) H(38) 1.00 . . no
 C(53) C(54) 1.35(1) . . ?
 C(53) H(39) 0.98 . . no
 C(54) C(55) 1.36(1) . . ?
 C(54) H(40) 0.99 . . no
 C(55) C(56) 1.40(1) . . ?
 C(55) H(41) 0.98 . . no
 C(56) C(57) 1.447(9) . . ?
 C(57) C(58) 1.37(1) . . ?
 C(57) C(62) 1.374(9) . . ?
 C(58) C(59) 1.39(1) . . ?
 C(58) H(42) 1.00 . . no
 C(59) C(60) 1.34(1) . . ?
 C(59) H(43) 0.97 . . no
 C(60) C(61) 1.41(1) . . ?
 C(60) H(44) 0.98 . . no
 C(61) C(62) 1.383(9) . . ?
 C(61) H(45) 0.99 . . no
 C(63) C(64) 1.555(8) . . ?
 C(63) H(46) 0.96 . . no
 C(63) H(47) 0.95 . . no
 C(64) C(65) 1.523(8) . . ?
 C(64) C(76) 1.509(9) . . ?
 C(64) C(77) 1.543(8) . . ?
 C(65) C(66) 1.344(9) . . ?
 C(65) C(70) 1.393(9) . . ?
 C(66) C(67) 1.40(1) . . ?
 C(66) H(48) 0.99 . . no
 C(67) C(68) 1.35(1) . . ?
 C(67) H(49) 0.99 . . no
 C(68) C(69) 1.40(1) . . ?
 C(68) H(50) 0.98 . . no
 C(69) C(70) 1.380(9) . . ?
 C(69) H(51) 0.98 . . no
 C(70) C(71) 1.451(9) . . ?
 C(71) C(72) 1.39(1) . . ?
 C(71) C(76) 1.396(9) . . ?
 C(72) C(73) 1.36(1) . . ?
 C(72) H(52) 0.99 . . no
 C(73) C(74) 1.36(1) . . ?
 C(73) H(53) 0.98 . . no
 C(74) C(75) 1.39(1) . . ?
 C(74) H(54) 1.00 . . no
 C(75) C(76) 1.370(9) . . ?
 C(75) H(55) 0.98 . . no
 C(77) C(78) 1.531(8) . . ?
 C(77) H(56) 0.97 . . no
 C(77) H(57) 0.97 . . no
 C(78) C(79) 1.384(9) . . ?
 C(78) C(83) 1.393(9) . . ?
 C(79) C(80) 1.41(1) . . ?
 C(79) H(58) 0.99 . . no
 C(80) C(81) 1.38(1) . . ?
 C(80) H(59) 1.00 . . no
 C(81) C(82) 1.39(1) . . ?
 C(81) H(60) 0.98 . . no
 C(82) C(83) 1.38(1) . . ?
 C(82) H(61) 0.97 . . no
 C(83) H(62) 0.99 . . no
#------------------------------------------------------------------------------
loop_
_geom_angle_atom_site_label_1
_geom_angle_atom_site_label_2
_geom_angle_atom_site_label_3
_geom_angle
_geom_angle_site_symmetry_1
_geom_angle_site_symmetry_2
_geom_angle_site_symmetry_3
_geom_angle_publ_flag
 C(2) C(1)  C(6) 120.8(8) . . . ?
 C(2) C(1)  C(7) 117.0(9) . . . ?
 C(6) C(1)  C(7) 122.1(9) . . . ?
 C(1) C(2)  C(3) 114(1) . . . ?
 C(1) C(2)  H(1) 122.9 . . . no
 C(3) C(2)  H(1) 122.5 . . . no
 C(2) C(3)  C(4) 120(1) . . . ?
 C(2) C(3)  H(2) 117.5 . . . no
 C(4) C(3)  H(2) 122.4 . . . no
 C(3) C(4)  C(5) 124(1) . . . ?
 C(3) C(4)  H(3) 118.0 . . . no
 C(5) C(4)  H(3) 118.1 . . . no
 C(4) C(5)  C(6) 119(1) . . . ?
 C(4) C(5)  H(4) 120.1 . . . no
 C(6) C(5)  H(4) 120.9 . . . no
 C(1) C(6)  C(5) 122(1) . . . ?
 C(1) C(6)  H(5) 118.7 . . . no
 C(5) C(6)  H(5) 119.5 . . . no
 C(1) C(7)  C(8) 115.3(6) . . . ?
 C(1) C(7)  H(6) 109.3 . . . no
 C(1) C(7)  H(7) 107.8 . . . no
 C(8) C(7)  H(6) 109.3 . . . no
 C(8) C(7)  H(7) 109.0 . . . no
 H(6) C(7)  H(7) 105.7 . . . no
 C(7) C(8)  C(9) 109.8(5) . . . ?
 C(7) C(8)  C(20) 110.4(6) . . . ?
 C(7) C(8)  C(21) 104.2(5) . . . ?
 C(9) C(8)  C(20) 101.2(7) . . . ?
 C(9) C(8)  C(21) 117.9(6) . . . ?
 C(20) C(8)  C(21) 113.4(6) . . . ?
 C(8) C(9)  C(10) 128.6(8) . . . ?
 C(8) C(9)  C(14) 110.5(9) . . . ?
 C(10) C(9)  C(14) 121(1) . . . ?
 C(9) C(10)  C(11) 115(1) . . . ?
 C(9) C(10)  H(8) 119.6 . . . no
 C(11) C(10)  H(8) 125.3 . . . no
 C(10) C(11)  C(12) 112(1) . . . ?
 C(10) C(11)  H(9) 115.9 . . . no
 C(12) C(11)  H(9) 131.4 . . . no
 C(11) C(12)  C(13) 125(3) . . . ?
 C(11) C(12)  H(10) 96.7 . . . no
 C(13) C(12)  H(10) 136.4 . . . no
 C(12) C(13)  C(14) 124(3) . . . ?
 C(12) C(13)  H(11) 110.7 . . . no
 C(14) C(13)  H(11) 124.2 . . . no
 C(9) C(14)  C(13) 121(2) . . . ?
 C(9) C(14)  C(15) 108(1) . . . ?
 C(13) C(14)  C(15) 131(2) . . . ?
 C(14) C(15)  C(16) 128(2) . . . ?
 C(14) C(15)  C(20) 108.4(9) . . . ?
 C(16) C(15)  C(20) 124(2) . . . ?
 C(15) C(16)  C(17) 118(3) . . . ?
 C(15) C(16)  H(12) 120.3 . . . no
 C(17) C(16)  H(12) 120.5 . . . no
 C(16) C(17)  C(18) 126(2) . . . ?
 C(16) C(17)  H(13) 122.6 . . . no
 C(18) C(17)  H(13) 111.3 . . . no
 C(17) C(18)  C(19) 113(2) . . . ?
 C(17) C(18)  H(14) 124.1 . . . no
 C(19) C(18)  H(14) 122.5 . . . no
 C(18) C(19)  C(20) 120(2) . . . ?
 C(18) C(19)  H(15) 122.5 . . . no
 C(20) C(19)  H(15) 117.8 . . . no
 C(8) C(20)  C(15) 112(1) . . . ?
 C(8) C(20)  C(19) 128(1) . . . ?
 C(15) C(20)  C(19) 120(1) . . . ?
 C(8) C(21)  C(22) 121.2(6) . . . ?
 C(8) C(21)  H(16) 106.6 . . . no
 C(8) C(21)  H(17) 105.7 . . . no
 C(22) C(21)  H(16) 107.8 . . . no
 C(22) C(21)  H(17) 107.0 . . . no
 H(16) C(21)  H(17) 107.9 . . . no
 C(21) C(22)  C(23) 110.9(5) . . . ?
 C(21) C(22)  C(34) 114.8(5) . . . ?
 C(21) C(22)  C(35) 102.5(5) . . . ?
 C(23) C(22)  C(34) 101.2(5) . . . ?
 C(23) C(22)  C(35) 115.0(5) . . . ?
 C(34) C(22)  C(35) 113.0(5) . . . ?
 C(22) C(23)  C(24) 129.5(6) . . . ?
 C(22) C(23)  C(28) 110.7(6) . . . ?
 C(24) C(23)  C(28) 119.8(7) . . . ?
 C(23) C(24)  C(25) 118.4(7) . . . ?
 C(23) C(24)  H(18) 120.6 . . . no
 C(25) C(24)  H(18) 121.0 . . . no
 C(24) C(25)  C(26) 122.3(7) . . . ?
 C(24) C(25)  H(19) 117.8 . . . no
 C(26) C(25)  H(19) 119.9 . . . no
 C(25) C(26)  C(27) 120.0(8) . . . ?
 C(25) C(26)  H(20) 119.0 . . . no
 C(27) C(26)  H(20) 120.9 . . . no
 C(26) C(27)  C(28) 120.3(7) . . . ?
 C(26) C(27)  H(21) 119.3 . . . no
 C(28) C(27)  H(21) 120.4 . . . no
 C(23) C(28)  C(27) 119.2(7) . . . ?
 C(23) C(28)  C(29) 109.0(6) . . . ?
 C(27) C(28)  C(29) 131.8(7) . . . ?
 C(28) C(29)  C(30) 131.1(8) . . . ?
 C(28) C(29)  C(34) 107.8(6) . . . ?
 C(30) C(29)  C(34) 121.2(7) . . . ?
 C(29) C(30)  C(31) 118.7(8) . . . ?
 C(29) C(30)  H(22) 120.5 . . . no
 C(31) C(30)  H(22) 120.7 . . . no
 C(30) C(31)  C(32) 122.2(8) . . . ?
 C(30) C(31)  H(23) 118.7 . . . no
 C(32) C(31)  H(23) 119.1 . . . no
 C(31) C(32)  C(33) 120.0(8) . . . ?
 C(31) C(32)  H(24) 121.6 . . . no
 C(33) C(32)  H(24) 118.4 . . . no
 C(32) C(33)  C(34) 117.5(8) . . . ?
 C(32) C(33)  H(25) 122.9 . . . no
 C(34) C(33)  H(25) 119.5 . . . no
 C(22) C(34)  C(29) 111.3(6) . . . ?
 C(22) C(34)  C(33) 128.4(7) . . . ?
 C(29) C(34)  C(33) 120.3(6) . . . ?
 C(22) C(35)  C(36) 121.4(5) . . . ?
 C(22) C(35)  H(26) 105.7 . . . no
 C(22) C(35)  H(27) 106.9 . . . no
 C(36) C(35)  H(26) 107.4 . . . no
 C(36) C(35)  H(27) 108.0 . . . no
 H(26) C(35)  H(27) 106.6 . . . no
 C(35) C(36)  C(37) 111.7(5) . . . ?
 C(35) C(36)  C(48) 115.4(5) . . . ?
 C(35) C(36)  C(49) 103.7(4) . . . ?
 C(37) C(36)  C(48) 102.2(5) . . . ?
 C(37) C(36)  C(49) 113.7(5) . . . ?
 C(48) C(36)  C(49) 110.5(5) . . . ?
 C(36) C(37)  C(38) 130.4(6) . . . ?
 C(36) C(37)  C(42) 110.8(5) . . . ?
 C(38) C(37)  C(42) 118.8(6) . . . ?
 C(37) C(38)  C(39) 121.6(7) . . . ?
 C(37) C(38)  H(28) 117.9 . . . no
 C(39) C(38)  H(28) 120.5 . . . no
 C(38) C(39)  C(40) 119.0(7) . . . ?
 C(38) C(39)  H(29) 121.8 . . . no
 C(40) C(39)  H(29) 119.2 . . . no
 C(39) C(40)  C(41) 122.6(8) . . . ?
 C(39) C(40)  H(30) 118.1 . . . no
 C(41) C(40)  H(30) 119.3 . . . no
 C(40) C(41)  C(42) 115.8(7) . . . ?
 C(40) C(41)  H(31) 122.0 . . . no
 C(42) C(41)  H(31) 122.2 . . . no
 C(37) C(42)  C(41) 122.2(7) . . . ?
 C(37) C(42)  C(43) 108.5(6) . . . ?
 C(41) C(42)  C(43) 129.3(7) . . . ?
 C(42) C(43)  C(44) 131.3(7) . . . ?
 C(42) C(43)  C(48) 108.1(6) . . . ?
 C(44) C(43)  C(48) 120.6(7) . . . ?
 C(43) C(44)  C(45) 117.9(7) . . . ?
 C(43) C(44)  H(32) 119.9 . . . no
 C(45) C(44)  H(32) 122.1 . . . no
 C(44) C(45)  C(46) 121.6(8) . . . ?
 C(44) C(45)  H(33) 120.0 . . . no
 C(46) C(45)  H(33) 118.4 . . . no
 C(45) C(46)  C(47) 121.2(7) . . . ?
 C(45) C(46)  H(34) 120.7 . . . no
 C(47) C(46)  H(34) 118.1 . . . no
 C(46) C(47)  C(48) 119.0(7) . . . ?
 C(46) C(47)  H(35) 121.7 . . . no
 C(48) C(47)  H(35) 119.4 . . . no
 C(36) C(48)  C(43) 110.4(5) . . . ?
 C(36) C(48)  C(47) 129.8(6) . . . ?
 C(43) C(48)  C(47) 119.8(6) . . . ?
 C(36) C(49)  C(50) 122.7(5) . . . ?
 C(36) C(49)  H(36) 106.9 . . . no
 C(36) C(49)  H(37) 105.9 . . . no
 C(50) C(49)  H(36) 107.9 . . . no
 C(50) C(49)  H(37) 106.4 . . . no
 H(36) C(49)  H(37) 105.9 . . . no
 C(49) C(50)  C(51) 111.2(5) . . . ?
 C(49) C(50)  C(62) 116.2(5) . . . ?
 C(49) C(50)  C(63) 104.0(5) . . . ?
 C(51) C(50)  C(62) 101.0(5) . . . ?
 C(51) C(50)  C(63) 112.7(5) . . . ?
 C(62) C(50)  C(63) 112.1(5) . . . ?
 C(50) C(51)  C(52) 128.4(6) . . . ?
 C(50) C(51)  C(56) 109.9(6) . . . ?
 C(52) C(51)  C(56) 121.7(7) . . . ?
 C(51) C(52)  C(53) 117.4(7) . . . ?
 C(51) C(52)  H(38) 120.6 . . . no
 C(53) C(52)  H(38) 122.0 . . . no
 C(52) C(53)  C(54) 122.2(8) . . . ?
 C(52) C(53)  H(39) 120.0 . . . no
 C(54) C(53)  H(39) 117.7 . . . no
 C(53) C(54)  C(55) 120.8(8) . . . ?
 C(53) C(54)  H(40) 121.5 . . . no
 C(55) C(54)  H(40) 117.6 . . . no
 C(54) C(55)  C(56) 120.3(8) . . . ?
 C(54) C(55)  H(41) 121.2 . . . no
 C(56) C(55)  H(41) 118.5 . . . no
 C(51) C(56)  C(55) 117.6(8) . . . ?
 C(51) C(56)  C(57) 107.8(7) . . . ?
 C(55) C(56)  C(57) 134.6(8) . . . ?
 C(56) C(57)  C(58) 129.4(8) . . . ?
 C(56) C(57)  C(62) 110.1(6) . . . ?
 C(58) C(57)  C(62) 120.5(8) . . . ?
 C(57) C(58)  C(59) 119.1(9) . . . ?
 C(57) C(58)  H(42) 120.7 . . . no
 C(59) C(58)  H(42) 120.1 . . . no
 C(58) C(59)  C(60) 120.9(9) . . . ?
 C(58) C(59)  H(43) 120.1 . . . no
 C(60) C(59)  H(43) 119.0 . . . no
 C(59) C(60)  C(61) 120.6(9) . . . ?
 C(59) C(60)  H(44) 121.8 . . . no
 C(61) C(60)  H(44) 117.6 . . . no
 C(60) C(61)  C(62) 118.2(8) . . . ?
 C(60) C(61)  H(45) 120.6 . . . no
 C(62) C(61)  H(45) 121.2 . . . no
 C(50) C(62)  C(57) 111.2(6) . . . ?
 C(50) C(62)  C(61) 128.0(7) . . . ?
 C(57) C(62)  C(61) 120.6(7) . . . ?
 C(50) C(63)  C(64) 122.0(5) . . . ?
 C(50) C(63)  H(46) 106.5 . . . no
 C(50) C(63)  H(47) 106.1 . . . no
 C(64) C(63)  H(46) 106.5 . . . no
 C(64) C(63)  H(47) 107.0 . . . no
 H(46) C(63)  H(47) 108.2 . . . no
 C(63) C(64)  C(65) 112.0(5) . . . ?
 C(63) C(64)  C(76) 117.0(5) . . . ?
 C(63) C(64)  C(77) 104.3(5) . . . ?
 C(65) C(64)  C(76) 102.7(5) . . . ?
 C(65) C(64)  C(77) 111.1(5) . . . ?
 C(76) C(64)  C(77) 109.9(5) . . . ?
 C(64) C(65)  C(66) 129.9(7) . . . ?
 C(64) C(65)  C(70) 109.0(6) . . . ?
 C(66) C(65)  C(70) 121.1(7) . . . ?
 C(65) C(66)  C(67) 119.0(8) . . . ?
 C(65) C(66)  H(48) 119.0 . . . no
 C(67) C(66)  H(48) 122.0 . . . no
 C(66) C(67)  C(68) 120.6(8) . . . ?
 C(66) C(67)  H(49) 119.4 . . . no
 C(68) C(67)  H(49) 120.0 . . . no
 C(67) C(68)  C(69) 120.9(8) . . . ?
 C(67) C(68)  H(50) 120.1 . . . no
 C(69) C(68)  H(50) 119.0 . . . no
 C(68) C(69)  C(70) 118.1(8) . . . ?
 C(68) C(69)  H(51) 121.5 . . . no
 C(70) C(69)  H(51) 120.4 . . . no
 C(65) C(70)  C(69) 120.3(7) . . . ?
 C(65) C(70)  C(71) 109.7(6) . . . ?
 C(69) C(70)  C(71) 130.0(8) . . . ?
 C(70) C(71)  C(72) 131.3(7) . . . ?
 C(70) C(71)  C(76) 108.7(6) . . . ?
 C(72) C(71)  C(76) 119.9(7) . . . ?
 C(71) C(72)  C(73) 120.1(8) . . . ?
 C(71) C(72)  H(52) 118.8 . . . no
 C(73) C(72)  H(52) 121.1 . . . no
 C(72) C(73)  C(74) 119.7(9) . . . ?
 C(72) C(73)  H(53) 120.4 . . . no
 C(74) C(73)  H(53) 120.0 . . . no
 C(73) C(74)  C(75) 122.2(8) . . . ?
 C(73) C(74)  H(54) 119.5 . . . no
 C(75) C(74)  H(54) 118.3 . . . no
 C(74) C(75)  C(76) 118.0(8) . . . ?
 C(74) C(75)  H(55) 121.9 . . . no
 C(76) C(75)  H(55) 120.0 . . . no
 C(64) C(76)  C(71) 109.8(6) . . . ?
 C(64) C(76)  C(75) 129.9(7) . . . ?
 C(71) C(76)  C(75) 120.1(7) . . . ?
 C(64) C(77)  C(78) 114.9(5) . . . ?
 C(64) C(77)  H(56) 109.1 . . . no
 C(64) C(77)  H(57) 109.3 . . . no
 C(78) C(77)  H(56) 108.5 . . . no
 C(78) C(77)  H(57) 108.6 . . . no
 H(56) C(77)  H(57) 106.1 . . . no
 C(77) C(78)  C(79) 120.8(7) . . . ?
 C(77) C(78)  C(83) 120.8(7) . . . ?
 C(79) C(78)  C(83) 118.4(6) . . . ?
 C(78) C(79)  C(80) 120.8(7) . . . ?
 C(78) C(79)  H(58) 119.4 . . . no
 C(80) C(79)  H(58) 119.7 . . . no
 C(79) C(80)  C(81) 119.1(8) . . . ?
 C(79) C(80)  H(59) 119.6 . . . no
 C(81) C(80)  H(59) 121.2 . . . no
 C(80) C(81)  C(82) 121.2(7) . . . ?
 C(80) C(81)  H(60) 117.5 . . . no
 C(82) C(81)  H(60) 120.9 . . . no
 C(81) C(82)  C(83) 118.8(8) . . . ?
 C(81) C(82)  H(61) 119.2 . . . no
 C(83) C(82)  H(61) 121.8 . . . no
 C(78) C(83)  C(82) 121.6(7) . . . ?
 C(78) C(83)  H(62) 118.1 . . . no
 C(82) C(83)  H(62) 120.2 . . . no
#------------------------------------------------------------------------------
loop_
_geom_contact_atom_site_label_1
_geom_contact_atom_site_label_2
_geom_contact_distance
_geom_contact_site_symmetry_1
_geom_contact_site_symmetry_2
_geom_contact_publ_flag
 C(13)     C(69)     3.59(2)    . 4_655 no
 C(16)     C(72)     3.45(2)    . 4_655 no
#------------------------------------------------------------------------------
loop_
_geom_torsion_atom_site_label_1
_geom_torsion_atom_site_label_2
_geom_torsion_atom_site_label_3
_geom_torsion_atom_site_label_4
_geom_torsion_site_symmetry_1
_geom_torsion_site_symmetry_2
_geom_torsion_site_symmetry_3
_geom_torsion_site_symmetry_4
_geom_torsion
_geom_torsion_publ_flag
 C(1) C(2) C(3) C(4) . . . . 0(2) no
 C(1) C(6) C(5) C(4) . . . . 2(2) no
 C(1) C(7) C(8) C(9) . . . . -54.1(9) no
 C(1) C(7) C(8) C(20) . . . . 57(1) no
 C(1) C(7) C(8) C(21) . . . . 178.7(7) no
 C(2) C(1) C(6) C(5) . . . . 0(2) no
 C(2) C(1) C(7) C(8) . . . . -93.5(9) no
 C(2) C(3) C(4) C(5) . . . . 1(3) no
 C(3) C(2) C(1) C(6) . . . . -1(1) no
 C(3) C(2) C(1) C(7) . . . . -178.4(8) no
 C(3) C(4) C(5) C(6) . . . . -2(3) no
 C(5) C(6) C(1) C(7) . . . . 177(1) no
 C(6) C(1) C(7) C(8) . . . . 89.1(9) no
 C(7) C(8) C(9) C(10) . . . . -61.0(9) no
 C(7) C(8) C(9) C(14) . . . . 114.7(7) no
 C(7) C(8) C(20) C(15) . . . . -113.5(8) no
 C(7) C(8) C(20) C(19) . . . . 64(1) no
 C(7) C(8) C(21) C(22) . . . . 163.3(6) no
 C(8) C(9) C(10) C(11) . . . . 178.3(7) no
 C(8) C(9) C(14) C(13) . . . . -178(1) no
 C(8) C(9) C(14) C(15) . . . . 0.7(9) no
 C(8) C(20) C(15) C(14) . . . . -3(1) no
 C(8) C(20) C(15) C(16) . . . . 180(1) no
 C(8) C(20) C(19) C(18) . . . . 179(1) no
 C(8) C(21) C(22) C(23) . . . . -76.4(7) no
 C(8) C(21) C(22) C(34) . . . . 37.6(8) no
 C(8) C(21) C(22) C(35) . . . . 160.4(6) no
 C(9) C(8) C(20) C(15) . . . . 2.8(8) no
 C(9) C(8) C(20) C(19) . . . . 179.9(8) no
 C(9) C(8) C(21) C(22) . . . . 41.3(9) no
 C(9) C(10) C(11) C(12) . . . . -7(2) no
 C(9) C(14) C(13) C(12) . . . . 8(4) no
 C(9) C(14) C(15) C(16) . . . . 179(1) no
 C(9) C(14) C(15) C(20) . . . . 1(1) no
 C(10) C(9) C(8) C(20) . . . . -177.7(7) no
 C(10) C(9) C(8) C(21) . . . . 58(1) no
 C(10) C(9) C(14) C(13) . . . . -2(2) no
 C(10) C(9) C(14) C(15) . . . . 176.7(7) no
 C(10) C(11) C(12) C(13) . . . . 13(4) no
 C(11) C(10) C(9) C(14) . . . . 3(1) no
 C(11) C(12) C(13) C(14) . . . . -14(5) no
 C(12) C(13) C(14) C(15) . . . . -171(3) no
 C(13) C(14) C(15) C(16) . . . . -2(2) no
 C(13) C(14) C(15) C(20) . . . . -180(1) no
 C(14) C(9) C(8) C(20) . . . . -2.1(7) no
 C(14) C(9) C(8) C(21) . . . . -126.3(7) no
 C(14) C(15) C(16) C(17) . . . . -178(2) no
 C(14) C(15) C(20) C(19) . . . . -179.9(8) no
 C(15) C(16) C(17) C(18) . . . . 0(4) no
 C(15) C(20) C(8) C(21) . . . . 130.1(8) no
 C(15) C(20) C(19) C(18) . . . . -4(2) no
 C(16) C(15) C(20) C(19) . . . . 2(2) no
 C(16) C(17) C(18) C(19) . . . . -2(3) no
 C(17) C(16) C(15) C(20) . . . . -0(2) no
 C(17) C(18) C(19) C(20) . . . . 4(2) no
 C(19) C(20) C(8) C(21) . . . . -53(1) no
 C(20) C(8) C(21) C(22) . . . . -76.6(9) no
 C(21) C(22) C(23) C(24) . . . . -55.8(8) no
 C(21) C(22) C(23) C(28) . . . . 121.6(5) no
 C(21) C(22) C(34) C(29) . . . . -119.6(6) no
 C(21) C(22) C(34) C(33) . . . . 62.0(8) no
 C(21) C(22) C(35) C(36) . . . . 161.6(5) no
 C(22) C(23) C(24) C(25) . . . . 177.9(6) no
 C(22) C(23) C(28) C(27) . . . . -179.2(6) no
 C(22) C(23) C(28) C(29) . . . . 1.3(7) no
 C(22) C(34) C(29) C(28) . . . . 0.9(7) no
 C(22) C(34) C(29) C(30) . . . . -179.2(6) no
 C(22) C(34) C(33) C(32) . . . . 178.6(6) no
 C(22) C(35) C(36) C(37) . . . . -76.0(7) no
 C(22) C(35) C(36) C(48) . . . . 40.1(7) no
 C(22) C(35) C(36) C(49) . . . . 161.1(5) no
 C(23) C(22) C(34) C(29) . . . . -0.1(6) no
 C(23) C(22) C(34) C(33) . . . . -178.6(6) no
 C(23) C(22) C(35) C(36) . . . . 41.2(7) no
 C(23) C(24) C(25) C(26) . . . . 0(1) no
 C(23) C(28) C(27) C(26) . . . . 1(1) no
 C(23) C(28) C(29) C(30) . . . . 178.8(7) no
 C(23) C(28) C(29) C(34) . . . . -1.3(7) no
 C(24) C(23) C(22) C(34) . . . . -178.1(6) no
 C(24) C(23) C(22) C(35) . . . . 59.8(8) no
 C(24) C(23) C(28) C(27) . . . . -1.5(9) no
 C(24) C(23) C(28) C(29) . . . . 179.0(5) no
 C(24) C(25) C(26) C(27) . . . . -1(1) no
 C(25) C(24) C(23) C(28) . . . . 0.7(9) no
 C(25) C(26) C(27) C(28) . . . . -0(1) no
 C(26) C(27) C(28) C(29) . . . . -179.3(7) no
 C(27) C(28) C(29) C(30) . . . . -1(1) no
 C(27) C(28) C(29) C(34) . . . . 179.2(7) no
 C(28) C(23) C(22) C(34) . . . . -0.7(6) no
 C(28) C(23) C(22) C(35) . . . . -122.8(5) no
 C(28) C(29) C(30) C(31) . . . . -179.3(7) no
 C(28) C(29) C(34) C(33) . . . . 179.5(6) no
 C(29) C(30) C(31) C(32) . . . . -1(1) no
 C(29) C(34) C(22) C(35) . . . . 123.4(6) no
 C(29) C(34) C(33) C(32) . . . . 0.3(9) no
 C(30) C(29) C(34) C(33) . . . . -0.6(9) no
 C(30) C(31) C(32) C(33) . . . . 1(1) no
 C(31) C(30) C(29) C(34) . . . . 1(1) no
 C(31) C(32) C(33) C(34) . . . . -0(1) no
 C(33) C(34) C(22) C(35) . . . . -55.1(8) no
 C(34) C(22) C(35) C(36) . . . . -74.3(7) no
 C(35) C(36) C(37) C(38) . . . . -54.5(8) no
 C(35) C(36) C(37) C(42) . . . . 123.9(5) no
 C(35) C(36) C(48) C(43) . . . . -120.9(5) no
 C(35) C(36) C(48) C(47) . . . . 61.4(8) no
 C(35) C(36) C(49) C(50) . . . . 163.1(5) no
 C(36) C(37) C(38) C(39) . . . . -179.9(6) no
 C(36) C(37) C(42) C(41) . . . . -179.6(6) no
 C(36) C(37) C(42) C(43) . . . . -0.5(7) no
 C(36) C(48) C(43) C(42) . . . . -0.8(7) no
 C(36) C(48) C(43) C(44) . . . . -178.9(5) no
 C(36) C(48) C(47) C(46) . . . . 179.1(6) no
 C(36) C(49) C(50) C(51) . . . . -75.3(7) no
 C(36) C(49) C(50) C(62) . . . . 39.5(8) no
 C(36) C(49) C(50) C(63) . . . . 163.2(5) no
 C(37) C(36) C(48) C(43) . . . . 0.5(6) no
 C(37) C(36) C(48) C(47) . . . . -177.1(6) no
 C(37) C(36) C(49) C(50) . . . . 41.5(7) no
 C(37) C(38) C(39) C(40) . . . . -2(1) no
 C(37) C(42) C(41) C(40) . . . . -0(1) no
 C(37) C(42) C(43) C(44) . . . . 178.6(6) no
 C(37) C(42) C(43) C(48) . . . . 0.8(7) no
 C(38) C(37) C(36) C(48) . . . . -178.4(6) no
 C(38) C(37) C(36) C(49) . . . . 62.5(8) no
 C(38) C(37) C(42) C(41) . . . . -1(1) no
 C(38) C(37) C(42) C(43) . . . . 178.1(5) no
 C(38) C(39) C(40) C(41) . . . . 1(1) no
 C(39) C(38) C(37) C(42) . . . . 2(1) no
 C(39) C(40) C(41) C(42) . . . . 0(1) no
 C(40) C(41) C(42) C(43) . . . . -178.9(7) no
 C(41) C(42) C(43) C(44) . . . . -2(1) no
 C(41) C(42) C(43) C(48) . . . . 179.8(7) no
 C(42) C(37) C(36) C(48) . . . . -0.0(7) no
 C(42) C(37) C(36) C(49) . . . . -119.1(5) no
 C(42) C(43) C(44) C(45) . . . . -176.9(7) no
 C(42) C(43) C(48) C(47) . . . . 177.1(5) no
 C(43) C(44) C(45) C(46) . . . . -1(1) no
 C(43) C(48) C(36) C(49) . . . . 121.9(5) no
 C(43) C(48) C(47) C(46) . . . . 1.6(9) no
 C(44) C(43) C(48) C(47) . . . . -0.9(9) no
 C(44) C(45) C(46) C(47) . . . . 2(1) no
 C(45) C(44) C(43) C(48) . . . . 1(1) no
 C(45) C(46) C(47) C(48) . . . . -2(1) no
 C(47) C(48) C(36) C(49) . . . . -55.8(8) no
 C(48) C(36) C(49) C(50) . . . . -72.7(7) no
 C(49) C(50) C(51) C(52) . . . . -53.5(8) no
 C(49) C(50) C(51) C(56) . . . . 124.6(6) no
 C(49) C(50) C(62) C(57) . . . . -121.7(6) no
 C(49) C(50) C(62) C(61) . . . . 63.2(8) no
 C(49) C(50) C(63) C(64) . . . . 159.9(5) no
 C(50) C(51) C(52) C(53) . . . . 179.3(6) no
 C(50) C(51) C(56) C(55) . . . . -178.8(6) no
 C(50) C(51) C(56) C(57) . . . . 0.0(7) no
 C(50) C(62) C(57) C(56) . . . . 1.4(7) no
 C(50) C(62) C(57) C(58) . . . . -177.1(6) no
 C(50) C(62) C(61) C(60) . . . . 177.6(6) no
 C(50) C(63) C(64) C(65) . . . . -78.0(7) no
 C(50) C(63) C(64) C(76) . . . . 40.2(8) no
 C(50) C(63) C(64) C(77) . . . . 161.8(5) no
 C(51) C(50) C(62) C(57) . . . . -1.3(6) no
 C(51) C(50) C(62) C(61) . . . . -176.4(6) no
 C(51) C(50) C(63) C(64) . . . . 39.4(8) no
 C(51) C(52) C(53) C(54) . . . . -1(1) no
 C(51) C(56) C(55) C(54) . . . . -1(1) no
 C(51) C(56) C(57) C(58) . . . . 177.5(7) no
 C(51) C(56) C(57) C(62) . . . . -0.9(7) no
 C(52) C(51) C(50) C(62) . . . . -177.4(6) no
 C(52) C(51) C(50) C(63) . . . . 62.8(8) no
 C(52) C(51) C(56) C(55) . . . . -0.5(9) no
 C(52) C(51) C(56) C(57) . . . . 178.3(6) no
 C(52) C(53) C(54) C(55) . . . . -0(1) no
 C(53) C(52) C(51) C(56) . . . . 1.3(9) no
 C(53) C(54) C(55) C(56) . . . . 1(1) no
 C(54) C(55) C(56) C(57) . . . . -179.2(8) no
 C(55) C(56) C(57) C(58) . . . . -4(1) no
 C(55) C(56) C(57) C(62) . . . . 177.7(7) no
 C(56) C(51) C(50) C(62) . . . . 0.7(6) no
 C(56) C(51) C(50) C(63) . . . . -119.1(6) no
 C(56) C(57) C(58) C(59) . . . . -178.2(8) no
 C(56) C(57) C(62) C(61) . . . . 176.9(6) no
 C(57) C(58) C(59) C(60) . . . . 0(1) no
 C(57) C(62) C(50) C(63) . . . . 118.9(6) no
 C(57) C(62) C(61) C(60) . . . . 3(1) no
 C(58) C(57) C(62) C(61) . . . . -2(1) no
 C(58) C(59) C(60) C(61) . . . . 1(2) no
 C(59) C(58) C(57) C(62) . . . . -0(1) no
 C(59) C(60) C(61) C(62) . . . . -3(1) no
 C(61) C(62) C(50) C(63) . . . . -56.2(8) no
 C(62) C(50) C(63) C(64) . . . . -73.8(7) no
 C(63) C(64) C(65) C(66) . . . . -52.0(9) no
 C(63) C(64) C(65) C(70) . . . . 128.4(6) no
 C(63) C(64) C(76) C(71) . . . . -125.6(6) no
 C(63) C(64) C(76) C(75) . . . . 58.9(9) no
 C(63) C(64) C(77) C(78) . . . . 173.8(6) no
 C(64) C(65) C(66) C(67) . . . . -179.3(6) no
 C(64) C(65) C(70) C(69) . . . . -179.4(6) no
 C(64) C(65) C(70) C(71) . . . . -0.9(7) no
 C(64) C(76) C(71) C(70) . . . . 2.2(7) no
 C(64) C(76) C(71) C(72) . . . . -176.9(6) no
 C(64) C(76) C(75) C(74) . . . . 176.7(6) no
 C(64) C(77) C(78) C(79) . . . . -91.3(9) no
 C(64) C(77) C(78) C(83) . . . . 89.6(8) no
 C(65) C(64) C(76) C(71) . . . . -2.6(6) no
 C(65) C(64) C(76) C(75) . . . . -178.0(6) no
 C(65) C(64) C(77) C(78) . . . . 53.0(8) no
 C(65) C(66) C(67) C(68) . . . . -1(1) no
 C(65) C(70) C(69) C(68) . . . . -1(1) no
 C(65) C(70) C(71) C(72) . . . . 178.2(7) no
 C(65) C(70) C(71) C(76) . . . . -0.8(7) no
 C(66) C(65) C(64) C(76) . . . . -178.3(7) no
 C(66) C(65) C(64) C(77) . . . . 64.2(8) no
 C(66) C(65) C(70) C(69) . . . . 1(1) no
 C(66) C(65) C(70) C(71) . . . . 179.4(6) no
 C(66) C(67) C(68) C(69) . . . . 1(1) no
 C(67) C(66) C(65) C(70) . . . . 0(1) no
 C(67) C(68) C(69) C(70) . . . . -0(1) no
 C(68) C(69) C(70) C(71) . . . . -179.2(7) no
 C(69) C(70) C(71) C(72) . . . . -3(1) no
 C(69) C(70) C(71) C(76) . . . . 177.5(6) no
 C(70) C(65) C(64) C(76) . . . . 2.1(6) no
 C(70) C(65) C(64) C(77) . . . . -115.4(6) no
 C(70) C(71) C(72) C(73) . . . . -178.2(7) no
 C(70) C(71) C(76) C(75) . . . . 178.2(6) no
 C(71) C(72) C(73) C(74) . . . . -1(1) no
 C(71) C(76) C(64) C(77) . . . . 115.7(6) no
 C(71) C(76) C(75) C(74) . . . . 2(1) no
 C(72) C(71) C(76) C(75) . . . . -1(1) no
 C(72) C(73) C(74) C(75) . . . . 2(1) no
 C(73) C(72) C(71) C(76) . . . . 1(1) no
 C(73) C(74) C(75) C(76) . . . . -2(1) no
 C(75) C(76) C(64) C(77) . . . . -59.8(8) no
 C(76) C(64) C(77) C(78) . . . . -60.0(8) no
 C(77) C(78) C(79) C(80) . . . . -177.6(8) no
 C(77) C(78) C(83) C(82) . . . . 179.5(8) no
 C(78) C(79) C(80) C(81) . . . . -2(2) no
 C(78) C(83) C(82) C(81) . . . . -1(2) no
 C(79) C(78) C(83) C(82) . . . . 0(1) no
 C(79) C(80) C(81) C(82) . . . . 1(2) no
 C(80) C(79) C(78) C(83) . . . . 2(1) no
 C(80) C(81) C(82) C(83) . . . . 0(2) no

#==============================================================================
# End of Crystallographic Information File
#==============================================================================
